# Supplementary material for: Short-term use of CGM in youth onset type 2 diabetes is associated with behavioral modifications
Source: PubMed Central journal article supplement (PMC10258317; doi:10.3389/fendo.2023.1182260), 2023-05-29
Supplement: Table_1.pdf [file Table_1.pdf]

**Supplemental Table 1: Comparison of Glycemic Data**

|                                        | <b>Baseline</b> | <b>5 Days</b> | <b>10 Days</b> | <b>3-6 months</b> |
|----------------------------------------|-----------------|---------------|----------------|-------------------|
| Variable                               | Mean (SD)       | Mean (SD)     | Mean (SD)      | Mean (SD)         |
| HbA1c (%), n=30                        | 10.2 (2.8)      | -             | -              | 10.3 (3.2)        |
| Glucose (mg/dL), n=18                  | -               | 213 (79)      | 212 (92)       | -                 |
| Time in Range 70-180 mg/dL (%), n=18   | -               | 49.2% (38)    | 50.7% (39)     | -                 |
| Time Below Range < 70 mg/dL (%), n=18  | -               | 0.1% (0.2)    | 0.1% (0.5)     | -                 |
| Time Above Range > 180 mg/dL (%), n=18 | -               | 50.6% (37.8)  | 49.1% (39.6)   | -                 |

Note: Only includes participants with baseline and follow up values who wore CGM for at least 8 days
